1 Yeast transformation efficiency is enhanced by  
2 TORC1- and eisosome-dependent signalling

3

4 Sheng-Chun Yu<sup>\*</sup>, Florian Kuemmel, Maria-Nefeli Skoufou-Papoutsaki,  
5 and Pietro D Spanu

6

7 Address: Department of Life Sciences, South Kensington Campus,  
8 Imperial College London, London, SW7 2AZ, United Kingdom.

9

10

11

12

13

14 <sup>\*</sup> Corresponding Author

15 Email: [joescyu@gmail.com](mailto:joescyu@gmail.com)

16

## 17 **ABSTRACT**

18 Transformation of baker's yeast (*Saccharomyces cerevisiae*) plays a key role in  
19 several experimental techniques, yet the molecular mechanisms underpinning  
20 transformation are still unclear. Addition of amino acids to the growth and  
21 transformation medium increases transformation efficiency. Here, we show that  
22 target of rapamycin complex 1 (TORC1) activated by amino acids enhances  
23 transformation via ubiquitin-mediated endocytosis. We created mutants of the  
24 TORC1 pathway,  $\alpha$ -arrestins, and eisosome-related genes. Our results demonstrate  
25 that the TORC1-Npr1-Art1/Rsp5 pathway regulates yeast transformation. Based on  
26 our previous study, activation of this pathway results in a 13-fold increase in  
27 transformation efficiency, or greater. Additionally, we suggest DNA is taken up by  
28 domains at the membrane compartment of Can1 (MCC) in the plasma membrane  
29 formed by eisosomes. Yeast studies on transformation could be used as a platform  
30 to understand the mechanism of DNA uptake in mammalian systems, which is  
31 clinically relevant to optimise gene therapy.

## 32 **INTRODUCTION**

33 Yeast transformation is the process by which exogenous DNA is introduced into the  
34 cell. It is a powerful tool of molecular biology research, for example in the yeast two-  
35 hybrid (Y2H) system for detection of protein-protein interactions (Fields and Song  
36 1989). Highly efficient protocols for chemical transformation have been established  
37 (Gietz 2015) but the molecular mechanisms underlying yeast transformation are not  
38 well understood. Several studies over the last four decades have investigated how  
39 DNA passes through the cell wall, through the plasma membrane (PM), and  
40 subsequently reaches the nucleus (Kawai, Hashimoto *et al.* 2010, Mitrikeski 2013).  
41 Foreign DNA is most likely to be engulfed via endocytic membrane invagination and  
42 several mutants involved in endocytosis show low transformation efficiencies (Kawai,  
43 Pham *et al.* 2004).

44 Ubiquitination of plasma membrane proteins can serve as an internalisation signal  
45 for endocytosis (Toret and Drubin 2006). In this way, the cell can downregulate  
46 receptors or transporters via transport to endosomes and lysosomal degradation

47 (Ghaddar, Merhi et al. 2014). In yeast, this process is mediated by the Rsp5 ubiquitin  
48 ligase that requires adaptor proteins for recruitment to the specific plasma  
49 membrane targets. Proteins that bind to Rsp5 and promote this function, include the  
50 arrestin-related trafficking adaptors (ARTs) such as Art1, Art3 and Bul1 (Yashiroda,  
51 Oguchi et al. 1996, Lin, MacGurn et al.). Several amino acid transporters are  
52 internalised by this form of endocytosis, including the general amino acid permease  
53 (Gap1) and the arginine-specific permease (Can1). The latter are targets of Bul1 and  
54 Art1, respectively (Ghaddar, Merhi et al. 2014). Phosphorylation of Art1 and Bul1/2  
55 by the Npr1 kinase cause translocation of Art1 from the plasma membrane to the  
56 Golgi apparatus and binding of Bul1 to the inhibitory 14-3-3 proteins. This prevents  
57 internalisation of the plasma membrane permeases (MacGurn, Hsu et al. 2011,  
58 O'Donnell 2012).

59 The target of rapamycin complex 1 (TORC1) is highly conserved among eukaryotes  
60 and functions as a master regulator of cell growth and metabolism through its own as  
61 well as downstream protein kinases. TORC1 activity depends on nutrient availability,  
62 and amino acids are potent stimulators *in vivo* (Conrad, Schothorst et al. 2014,  
63 Dokudovskaya and Rout 2015, González and Hall 2017). When active, TORC1  
64 promotes ubiquitin-mediated endocytosis by inhibiting Npr1, which in turn is a  
65 negative regulator of  $\alpha$ -arrestins acting in endocytic cargo sorting. Npr1  
66 phosphorylates Art1 and this prevents Art1 from associating with the PM. In this way,  
67 the target of rapamycin (TOR) pathway connects amino acid sensing with  
68 endocytosis (MacGurn, Hsu et al. 2011).

69 The downstream plasma membrane targets of Art1 include nutrient permeases that  
70 accumulate in the membrane compartment of Can1 (MCC). The membrane  
71 composition of MCC differs from other membrane compartments by its higher  
72 content of ergosterol (Grossmann, Opekarová et al. 2007). Eisosomes, first  
73 discovered in 1963 in early electron microscopy studies (Moor and Muhlethaler  
74 1963), are cytosolic multi-protein complexes that form 50-300 nm deep furrow-like  
75 invaginations of the plasma membrane associated with the MCC region (Stradalova,  
76 Stahlschmidt et al. 2009). Eisosomes act as a hub for various signalling pathways  
77 and they may play a role in endocytosis, although their exact function is not well

78 understood (Walther, Brickner et al. 2006, Fröhlich, Moreira et al. 2009, Douglas and  
79 Konopka 2014).

80 Recently, we developed a yeast transformation protocol called SuccessAA (Yu,  
81 Dawson et al. 2016). Using this method, we found that adding nutrients to the  
82 transformation and competence reagents substantially increased transformation  
83 efficiencies. We speculated that the mechanism underlying this effect was due to the  
84 activation of the TORC1 complex, which in turn promotes DNA uptake via ubiquitin-  
85 mediated endocytosis.

86 The aim of our study was to investigate the molecular mechanisms of yeast  
87 transformation and the events that lead to the increase in transformation efficiency  
88 by addition of nutrients. We found that mutations of endocytic components resulted  
89 in changes in transformation efficiencies supporting the hypothesis that TORC1 and  
90 ubiquitin-mediated endocytosis is key to yeast transformation. Moreover, the  
91 boosting effect was observed in several distinct strains, highlighting the potential for  
92 the general application of the SuccessAA protocol to budding yeast transformation.

## 93 **RESULTS**

### 94 **The addition of amino acids results in increased transformation** 95 **efficiency in different *S. cerevisiae* strains**

96 The applicability of the SuccessAA protocol to different budding yeast strains was  
97 examined by transforming four *S. cerevisiae* strains with a 13.8 kb plasmid (Figure  
98 1A) namely THY.AP4, BY4743, W303-1A and MaV203. In all cases, the  
99 transformation efficiency after the addition of nutrients was substantially higher than  
100 without nutrient addition. The observed increases in efficiency were 15-fold  
101 ( $p=0.0079$ ); 6-fold ( $p=0.0079$ ) and 37-fold ( $p=0.0079$ ) for THY.AP4, BY4743 and  
102 W303-1A, respectively. We deduce that the genetic requirements for this effect are  
103 likely to be conserved in *S. cerevisiae*. Therefore, adding nutrients during yeast  
104 transformation may provide a generally applicable method to boost transformation  
105 efficiency for budding yeast.

106

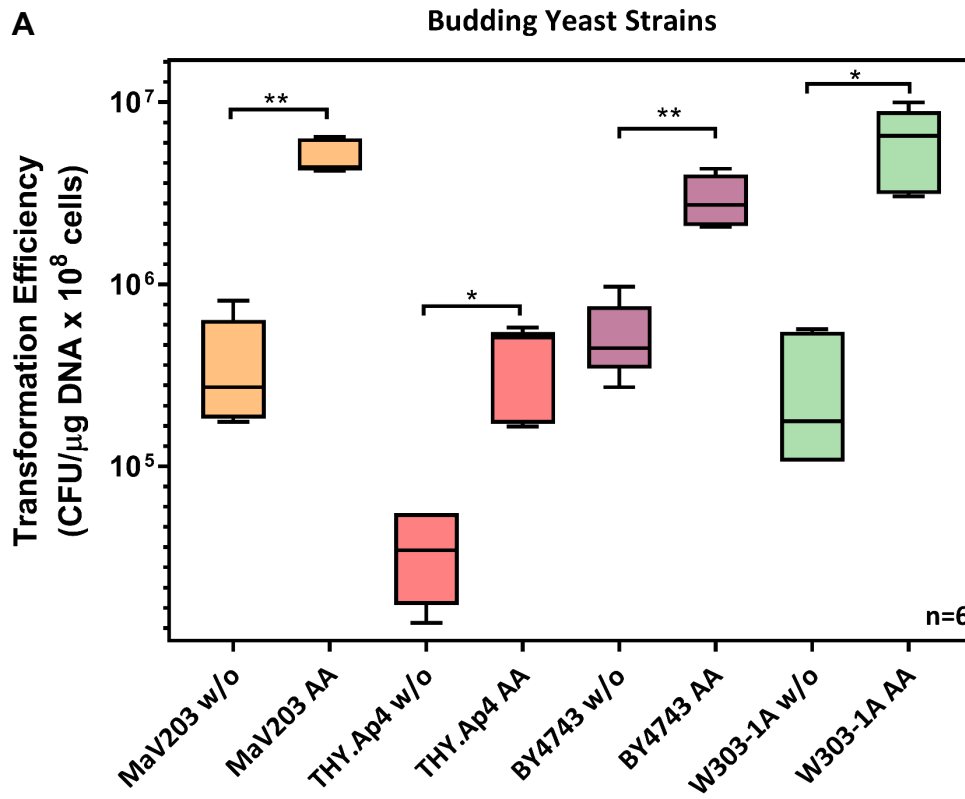

107

108

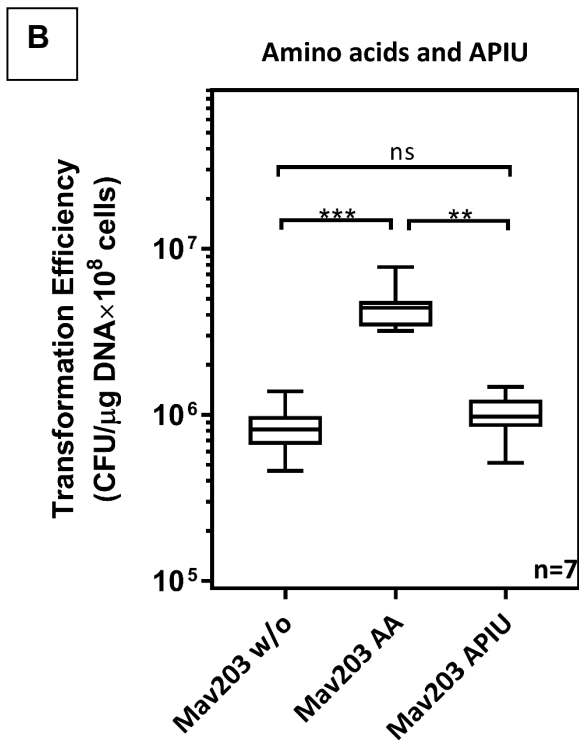

109

110 **Figure 1. Amino acid addition results in higher transformation efficiency in different budding yeast strains.**

111 (A) Four budding yeast strains, namely MaV203, THY.Ap4, BY4743, and W303-1A, were used to test the effect  
112 of nutrient addition on boosting yeast transformation efficiency. Each one of the strains was transformed with  
113 or without nutrient supplement (drop-out leucine) during the transformation process, followed by three-day  
114 culture on 1x YPAD drop-out leucine plates and then the corresponding transformation efficiencies were  
115 calculated. Statistical significance was assessed by using the Mann-Whitney test. Nutrient addition caused a  
116 significant increase in transformation efficiency in all four yeast strains. Results are from six independent  
117 biological replicates. (B) The MaV203 yeast strain was used to test if the boost effect was caused by either  
118 amino acids or by four other nutrients, namely, adenine, p-aminobenzoic acid, inositol, and uracil (APIU).  
119 MaV203 was transformed without nutrient addition, with amino acid addition (drop-out leucine), or with APIU  
120 addition, followed by three-day culturing on 1x YPAD drop-out leucine plates. The corresponding efficiencies  
121 were then assessed by the Kruskal-Wallis test, followed by Dunn's post-hoc test. Amino acid addition resulted  
122 in significantly higher transformation efficiencies. Results are from seven independent biological replicates.

123

124 To determine which of the nutrients added in the SuccessAA protocol are necessary  
125 for the boosting of competence, we tested the effect of a mixture of all amino acids  
126 (AA) or Adenine, p-aminobenzoic acid, Inositol, and Uracil (APIU). The addition of  
127 only APIU did not cause any significant change in the transformation efficiency  
128 (Figure 1B) while amino acids caused the same increases seen in previous  
129 experiments where a complex nutrient supplement was employed.

130 **TORC1-regulated endocytosis is required for enhanced transformation**  
131 **efficiency**

132 Previous studies demonstrated that amino acids in the growth medium activate the  
133 TORC1 complex which in turn regulates ubiquitin-mediated endocytosis of nutrient  
134 permeases via Npr1 and Art1 (MacGurn, Hsu et al. 2011). Here, we tested the  
135 hypothesis that altering the rate of endocytosis by addition of amino acids leads to  
136 increased DNA uptake. To achieve this, we created mutant strains lacking  
137 components of the TORC1-dependent endocytic pathway (Figure 2), and analysed  
138 the effect this had on transformation efficiency (Figure 3). We found that  
139 transformation was no longer influenced by addition of amino acids to the medium  
140 and transformation mix when either *tco89* (the core subunit of TORC1,  $p=0.9619$ ) or  
141 *art1* ( $p= 0.9983$ ) had been deleted. Conversely, the efficiency increases when *npr1*,

142 a negative regulator of TORC1 mediated endocytosis, was missing. Note, this effect  
143 was visible even in the absence of any additions to the medium (Tukey's multiple  
144 comparisons test,  $p=0.0021$  (wild type yeast without amino acid addition vs *npr1* $\Delta$   
145 without amino acid addition), but it was further enhanced when amino acids were  
146 supplied ( $p<0.0001$  (wild type yeast with amino acid addition vs  $\Delta$ *npr1* with amino  
147 acid addition).

148 It has previously been reported that when TORC1 is inactivated, Npr1 stabilizes the  
149 yeast plasma membrane general amino acid permease Gap1, by phosphorylating  
150 alpha arrestin-like adaptors (Bul1/2); this leads to binding of 14-3-3 proteins and  
151 cellular re-localization, which antagonises ubiquitin-mediated endocytosis (Merhi and  
152 Andre 2012). Phosphorylation of  $\alpha$ -arrestins or arrestin-like adaptors (Art1, Art2,  
153 Art3, Art5, Art6, and Bul1/2) increases in rapamycin-treated yeast cells  
154 (Iesmantavicius, Weinert et al. 2014). Art2 is an arrestin that does not regulate amino  
155 acid induced endocytosis (Nikko and Pelham 2009) and Art5 targets a permease for  
156 inositol, which is not involved in the transformation enhancing effect we observed.  
157 Furthermore, the activity and the phosphorylation of Art3, but not Art6, are directly  
158 regulated by Npr1 (O'Donnell 2012).

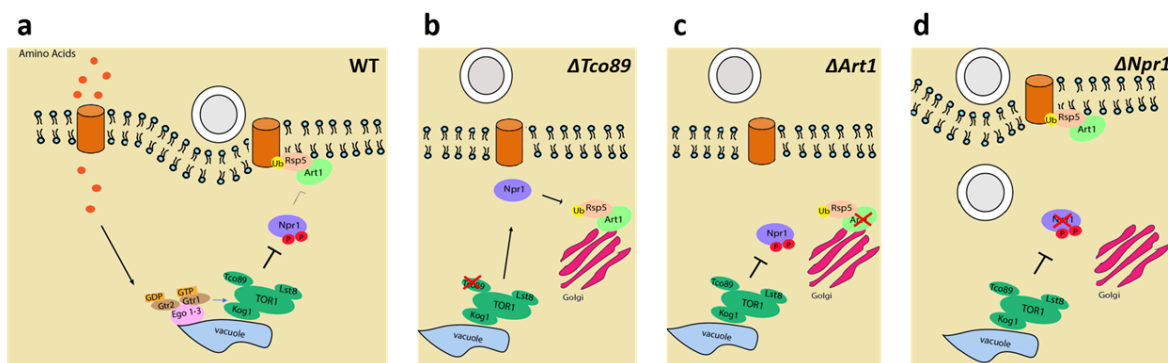

159

160 **Figure 2. Illustration of the signalling pathways connecting perception of amino acids and endocytosis in**  
161 **wild-type,  $\Delta$ *tco89*,  $\Delta$ *art1* and  $\Delta$ *npr1* cells.**

162 **(A)** In wild type yeast, intracellular amino acids stimulate TORC1, via the Ego 1-3 complex. TORC1 in turn  
163 inhibits Npr1 by phosphorylation, allowing the alpha arrestin adaptor Art1 and ubiquitin ligase Rsp5 to be  
164 recruited in the plasma membrane and bind to amino acid transporters, leading to their ubiquitination,  
165 subsequent endocytosis and simultaneous plasmid DNA uptake. **(B)** When *tco89* is deleted, TORC1 signalling is  
166 impaired, the Npr1 kinase is active and phosphorylates Art1 leading to Art1/Rsp5 translocating to the Golgi-

167 apparatus. Amino acid permeases endocytosis and simultaneous plasmid DNA uptake are hindered, as the  
168 amino acid permeases will not be ubiquitinated. **(C)** When *art1* is deleted, Rsp5 cannot be recruited at the  
169 plasma membrane to bind to and ubiquitinate amino acid permeases. Therefore, endocytosis of nutrient  
170 permeases and simultaneous plasmid DNA uptake are hindered. **(D)** When the negative regulator *npr1* is  
171 deleted, the inhibition on Art1's function in endocytosis is removed. Under this condition, binding of Art1/Rsp5  
172 to amino acid permeases is increased and Art1/Rsp5 are continuously recruited to the plasma membrane,  
173 which, in turn, stimulates amino acid permeases and plasmid DNA invagination.

174 Here, we investigated the roles of Art1, Art3, Bul1 and the ubiquitin ligase Rsp5 in  
175 facilitating the increase in transformation by targeted gene deletion and a  
176 complementation. The transformation efficiencies of  $\Delta art1$ ,  $\Delta bul1$ , and  $\Delta art3$  cells  
177 were compared to that of wild type *S. cerevisiae* (Figure 3C). The median  
178 transformation efficiencies of  $\Delta art1$ ,  $\Delta art3$  and  $\Delta bul1$  without amino acid addition was  
179 not significantly higher than those of wild-type yeast without amino acid addition  
180 (Tukey's multiple comparisons test,  $p=0.5640$  (wild-type vs  $\Delta art1$ ),  $p=0.9195$  (wild-  
181 type vs  $\Delta art3$ ),  $p=0.9908$  (wild-type vs  $\Delta bul1$ )). When amino acids were added to the  
182  $\Delta art3$  and  $\Delta bul1$  strains, transformation efficiencies were substantially higher for both  
183  $\Delta art3$  and  $\Delta bul1$  (up to about 20-fold; Tukey's multiple comparisons test,  $p<0.0001$ ).  
184 In contrast, as seen before, there was no boosting effect in the  $\Delta art1$  mutant  
185 (Tukey's multiple comparisons test,  $p=0.9367$ ). We deduce from this that TORC1-  
186 Npr1-Art1 signalling is specifically required for the boost in transformation efficiency  
187 induced by addition of amino acids to the media.

188 To test this hypothesis further, and to elucidate the role of the Rsp5, we carried out  
189 complementation of these mutants by 1) by the wild-type *art1* gene (pRS426-Ldb19)  
190 and a mutant *art1* gene from which the Rsp5-binding domain is deleted (pRS426-  
191 Ldb19PPxY-less) (Figure 2D). We found that  $\Delta art1$  was effectively rescued by the  
192 wild type gene: addition of amino acids significantly increased (over 24-fold; Tukey's  
193 multiple comparisons test,  $p<0.0001$ ). Conversely, there was no significant  
194 difference when  $\Delta art1$  was complemented by the gene lacking the Rsp5-binding  
195 domain (Tukey's multiple comparisons test,  $p=0.6103$ ). In summary, we found that  
196 the enhancement of transformation in response to addition of amino acids is  
197 mediated by TORC1-Npr1-Art1/Rsp5 (coloured) rather than other TORC1-Npr1-  
198 arrestins/Rsp5 routes (grey) (Figure 3D). Moreover, Rsp5 binding to Art1 is essential  
199 for this, which indicates that Rsp5-mediated mono-ubiquitination of plasma



200 membrane cargo followed by ubiquitin-mediated endocytosis are necessary for  
 201 enhanced yeast transformation.

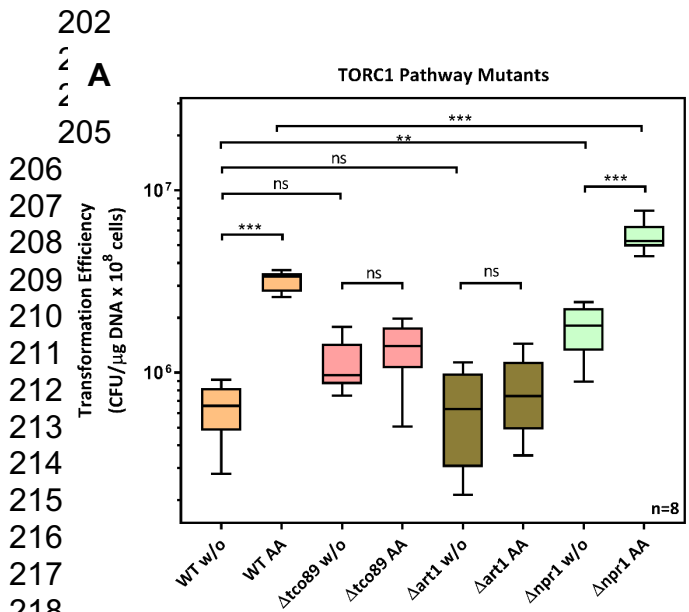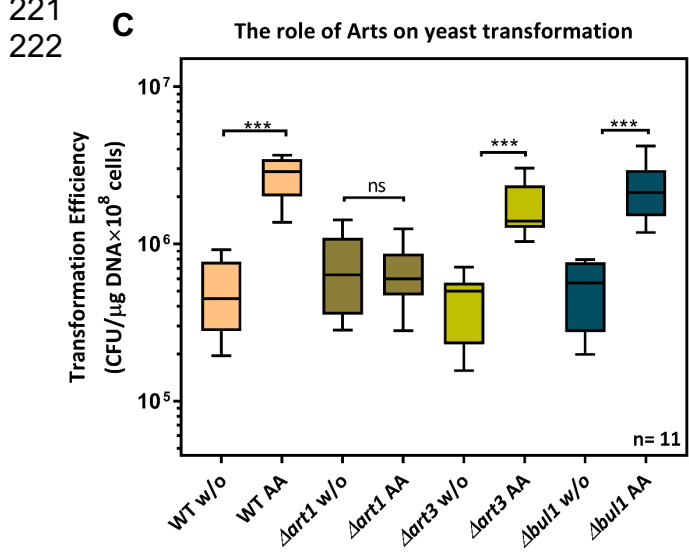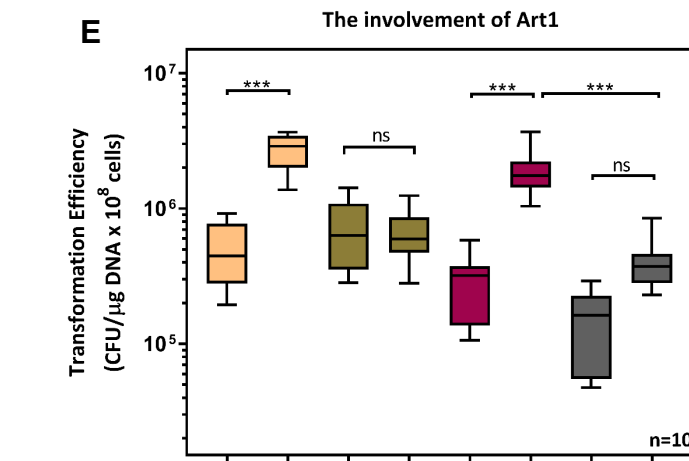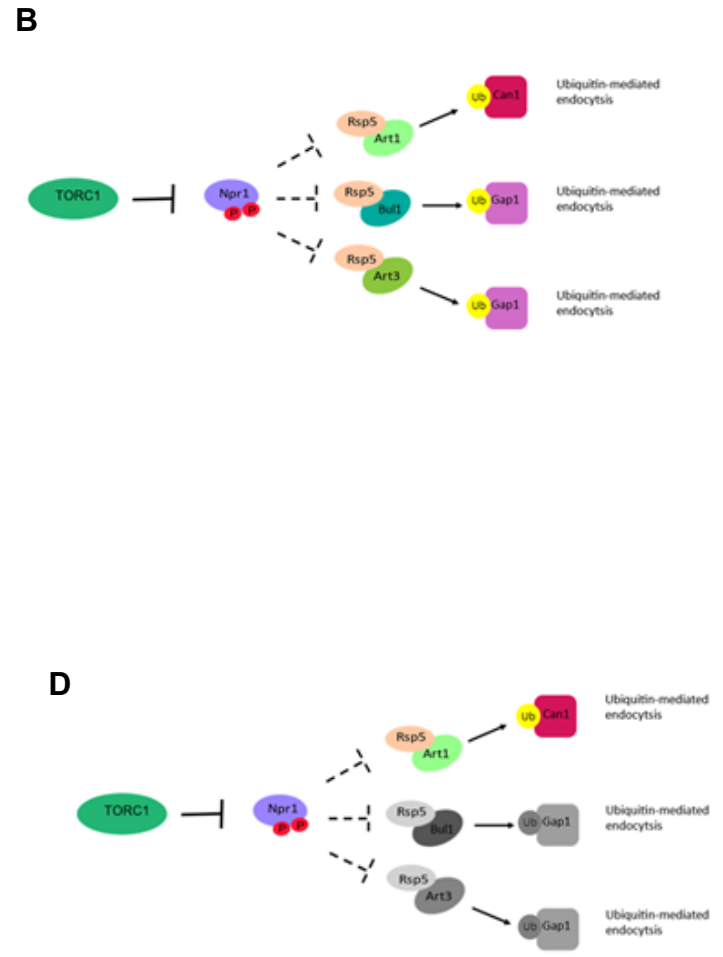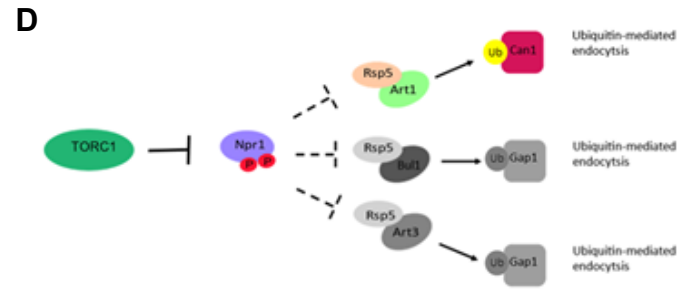

223  
224  
225  
226

**Figure 3. The TORC1 signalling pathway is involved in yeast transformation.**

227 **(A)** Three genes involved in TORC-1 signalling were deleted from *S. cerevisiae* MaV203: the three strains  
228 generated were  $\Delta tco89$ ,  $\Delta art1$ , and  $\Delta npr1$ . Wild-type yeast (MaV203) and the mutant strains were  
229 transformed either with or without amino acid addition. The corresponding efficiencies were assessed by  
230 Tukey's multiple comparisons test. The boosting effect was absent when either *tco89* or *art1* was deleted  
231 while transformation was enhanced when *npr1* was deleted. Results are from eight independent biological  
232 replicates. **(B)** The cartoon shows the pathways from TORC-1 to Npr1's downstream targets, Art1, Art3, and  
233 Bul1. When TORC1 is active, the Npr1 kinase is inhibited, which allows Art1/Rsp5 binding to amino acid  
234 permease Can1, followed by Can1 invagination. When *npr1* is inhibited, it also allows Art3/Rsp5 and Bul1/Rsp5  
235 acting in ubiquitin-dependent cargo-selection of the general amino acid permease Gap1. **(C)** The requirement  
236 of different arrestins for transformability was tested. Three MaV203 mutants were generated, namely,  $\Delta art1$ ,  
237  $\Delta art3$ ,  $\Delta bul1$ , and these mutants were transformed either with or without amino acid addition, followed by  
238 three-day culturing on 1x YPAD drop-out leucine and tryptophan. The corresponding transformation  
239 efficiencies were assessed by Tukey's multiple comparisons test. Boosting was abolished only when Art1 was  
240 deleted suggesting that the effect is mediated by TORC1-Npr1-Art1 signalling route. Results are from eleven  
241 independent biological replicates. **(D)** The boosting effect is mediated by TORC1-Npr1-Art1/Rsp5 signalling (in  
242 colour) while both TORC1-Npr1-Art3/Rsp5 signalling and TORC1-Npr1-Bul1/Rsp5 signalling are not involved in  
243 boosting (in grey colour). **(E)** The Art1-PPxY-motif is required for effective plasmid DNA uptake. MaV203,  
244  $\Delta art1$ ,  $\Delta art1$  carrying pRS426-Ldb19 (*art1+*), and  $\Delta art1$  carrying pRS426-Ldb19PPxY-less (the PPxY motif  
245 required for Rsp5 binding was deleted from Art1) were transformed either with or without amino acid  
246 addition. After the transformation, the cells were cultured on 1x YPAD selection plates for three-days, followed  
247 by assessing the efficiencies by Tukey's multiple comparisons test. The results demonstrated that  
248 complementation of Art1 in  $\Delta art1$  restored boosting. However, the effect was not observed when Art1 was  
249 expressed without the Rsp5 binding ability. Results are from ten independent biological replicates.

250

## 251 Seg1 is required for high-efficiency yeast transformation

252 The integrity of eisosomes is known to affect the efficacy of endocytosis (Murphy,  
253 Boxberger *et al.* 2011). Here, we investigated the effect of MCC/eisosome formation  
254 on yeast transformation by deletion of *seg1* (known to impair the formation of  
255 eisosomes (Moreira, Schuck *et al.* 2012) and by deletion of *ypk1* (a kinase involved  
256 in eisosome formation (Luo, Gruhler *et al.* 2008)) (Figure 4). We found that removing  
257 *seg1* or *ypk1* resulted in no amino-acid induced increase in transformation efficiency  
258 ( $\Delta seg1$  without amino acid addition vs  $\Delta seg1$  with amino acid addition;  $p=0.9873$ ;  
259  $\Delta ypk1$  without amino acid addition vs  $\Delta ypk1$  with amino acid addition,  $p=0.9976$ ). It  
260 is noteworthy that although the boosting effect on both  $\Delta seg1$  or  $\Delta ypk1$  disappeared,  
261 there were evident differences in the basal transformation efficiencies in the absence  
262 of added amino acids to the media (wild-type vs  $\Delta seg1$ :  $p=0.0249$ ; wild-type vs  
263  $\Delta ypk1$ :  $p=0.0118$ ).

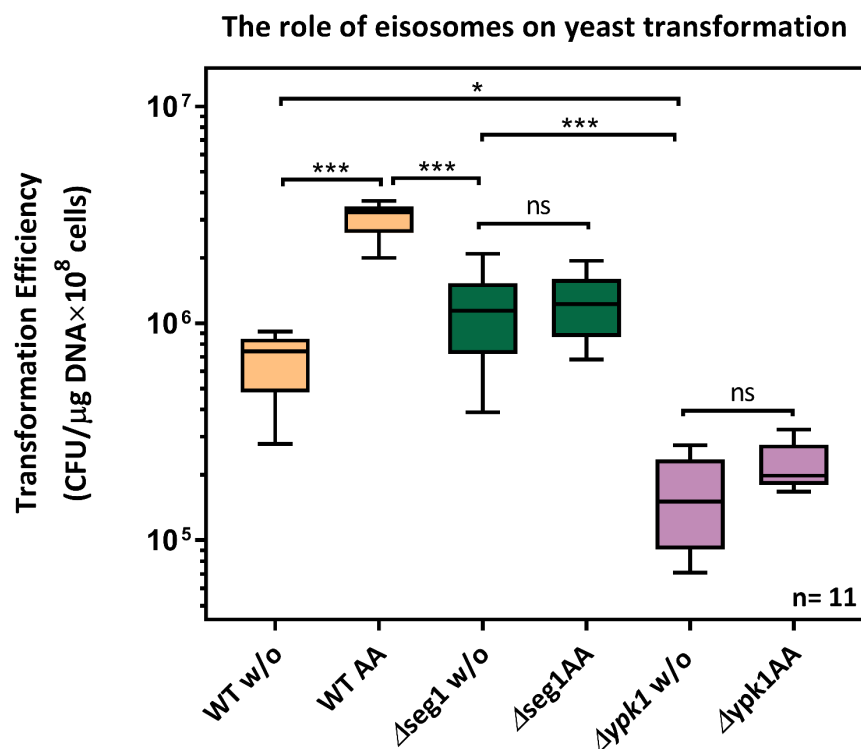

264

265 **Figure 4. Eisosomes are required for increased transformation efficiency in yeast.**  $\Delta seg1$  and  $\Delta ypk1$   
266 strains generated by deletion of the respective genes were transformed either with or without  
267 amino acid addition to the media. The corresponding transformation efficiencies were analysed by  
268 Tukey's multiple comparisons test. The results showed that the boosting effect is abolished in both

269  $\Delta seg1$  and  $\Delta ypk1$ , suggesting that functional eisosome formation and signalling are required for  
270 highly efficient yeast transformation. Results are representative of 11 independent biological  
271 replicates.

## 272 Discussion

273 Yeast transformation has been described for almost 40 years (Hinnen, Hicks *et al.*  
274 1978) and is a cornerstone of many fundamental methods in genetics, cell biology as  
275 well as practical biotechnological applications. It is therefore surprising there are only  
276 few mechanistic explanations of the processes underpinning this key technique  
277 although several have been proposed (Beggs 1978). One model suggests that  
278 foreign DNA is engulfed via endocytic membrane invagination; this is supported by  
279 the observation that several low transformability phenotypes are caused by mutation  
280 of genes involved in endocytosis (Kawai, Pham *et al.* 2004). Here, we tested the  
281 extent to which targeted deletions of single endocytic genes affect competence, and  
282 we observed how the changes to nutrients in the growth and the transformation  
283 media affected transformation efficiency. We found that adding amino acids boosted  
284 competence in all four strains of *S. cerevisiae* tested, demonstrating that this  
285 phenomenon is likely to be generally applicable in budding yeast. We propose a  
286 model to summarise the processes described here (Figure 5).

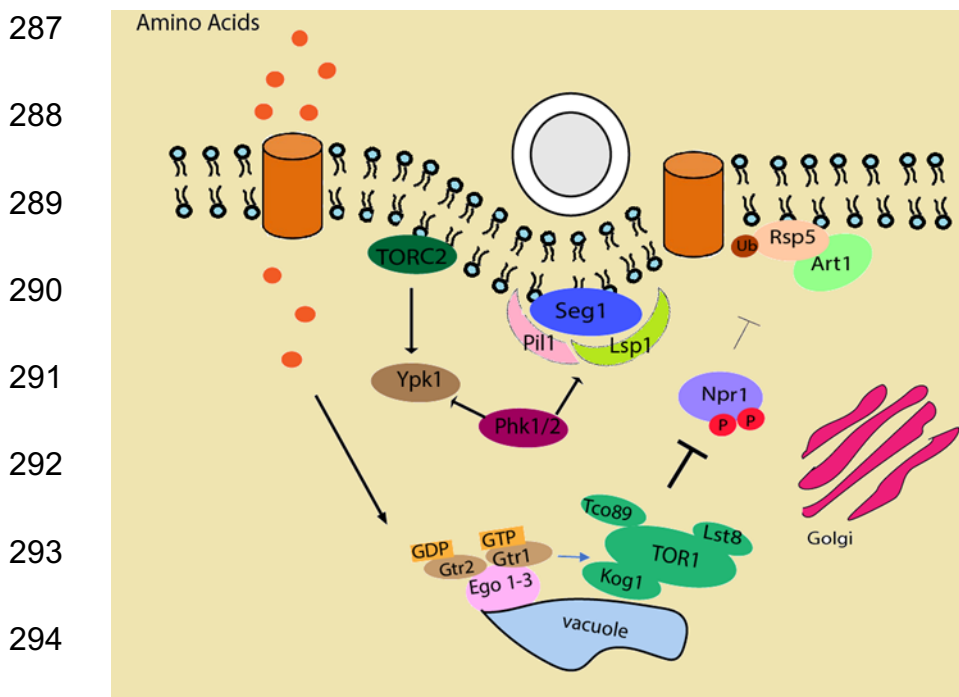

296 **Figure 5. Proposed model of TORC1-regulated DNA uptake in yeast and the involvement of eisosomes.**

297 Amino acids are transported into the cell cytoplasm via amino acid permeases, where they stimulate TORC1.  
298 Activated TORC1 inhibits the Npr1 which, in turn, facilitates Art1/Rsp5-dependent cargo selection and  
299 subsequent endocytosis with simultaneous plasmid DNA uptake. Seg1, Pil1 and Lsp1 are the main proteins  
300 involved in eisosome formation and stability. Phk1/2 phosphorylates Ypk1 and Seg1 this initiates the  
301 deposition of Pil1/Lsp1 where eisosomes form. Following this, phosphorylation of Pil1 stabilises the formation  
302 of eisosomes, which, in turn, enhances the rate of plasmid DNA internalisation.

303 **TORC1 and other pathways impinge on transformation efficiency**

304 The *tco89* gene encodes a subunit of TORC1. We observed that in  $\Delta tco89$  cells  
305 there was never any boosting effect in response to nutrient stimuli. However,  
306 deletion of *tco89* did not lead to changes in basal competence, but only affected the  
307 boost induced by amino acids in the media. Therefore, while TORC1 is necessary for  
308 the regulation of the amino acid-induced effect, there are also other pathways  
309 underpinning DNA uptake. Plasma membrane permeases such as Can1 are under  
310 the control of TORC1, but are also internalized in response to their substrate,  
311 independently of TORC1 signalling (Opekarova, Caspari et al. 1998, Ghaddar, Merhi  
312 et al. 2014). Our results imply that, in contrast to TORC1-regulated internalization,  
313 the influx-stimulated internalization of PM permeases does not contribute to efficient  
314 DNA uptake or subsequent delivery to the nucleus.

315 In contrast, the basal competence of  $\Delta npr1$  cells was higher than wild type. This was  
316 attributed to abolition of the of  $\alpha$ -arrestins' inhibition of these endocytic processes  
317 (MacGurn, Hsu et al. 2011). The boost of transformation observed in  $\Delta npr1$  cells  
318 treated with amino acids reveals there are other regulators of arrestins under the  
319 control of TORC1, in addition to Npr1.

320 **Efficient DNA delivery requires functional Art1**

321 We discovered that a functional Art1 was indispensable for high transformability in  
322 response to amino acids. In experiments where we complemented the *art1* deletion,  
323 we also observed that the Rsp5-binding domain of Art1 was required for the boosting  
324 effect. Because of this, we propose that ubiquitin-mediated cargo sorting is involved  
325 in efficient DNA uptake *in vivo*.

326 While Art1 was needed for high transformability in response to amino acids, deletion  
327 of other arrestins that act in a similar manner (Bul1, Art3) had no effect. This is  
328 important as both Bul1 and Art3 are under the control of Npr1 and are involved in  
329 endocytosis (O'Donnell, Apffel et al. 2010, O'Donnell 2012). Thus, the TORC1 –  
330 Npr1-Art1 pathway is specifically responsible for the effect on competence  
331 investigated here. This might be explained by the observation that the three arrestins  
332 we tested have different targets localised to different domains of the  
333 plasmamembrane. For example, Art1 is involved in Can1 endocytosis, whereas Bul1  
334 and Art3 function in Gap1 down-regulation and recycling (Helliwell, Losko et al.  
335 2001, Lin, MacGurn et al. 2008, O'Donnell, Apffel et al. 2010). In the plasma  
336 membrane, whilst Gap1 is uniformly distributed (Lauwers, Grossmann et al. 2007),  
337 there are specific compartments containing Can1 (MCC) (Nikko and Pelham 2009):  
338 therefore, these results hinted that MCC may be important domain in transformation  
339 competence.

#### 340 **Involvement of eisosomes in yeast transformation**

341 Eisosomes are cytosolic multi-protein complexes that form 50-300 nm deep  
342 invaginations of the plasma membrane associated with the MCC domain  
343 (Stradalova, Stahlschmidt et al. 2009). The membrane composition of the MCC  
344 differs from other yeast membrane compartments because it contains more  
345 ergosterol (Grossmann, Opekarová et al. 2007). Eisosomes act as a hub for various  
346 signalling pathways and may play a role in endocytosis (Walther, Brickner et al.  
347 2006, Fröhlich, Moreira et al. 2009, Douglas and Konopka 2014). Research on  
348 endocytic activity associated to eisosomes has led to several intensely debated  
349 results (Grossmann, Malinsky et al. 2008, Vangelatos, Roumelioti et al. 2010, Brach,  
350 Specht et al. 2011, Murphy, Boxberger et al. 2011, Seger, Rischatsch et al. 2011,  
351 Athanasopoulos, Boleti et al. 2013). Eisosomes require *seg1* for stability (Moreira,  
352 Schuck et al. 2012).

353 Our finding that mutant strains lacking *seg1* do not show high transformability in  
354 response to an amino acid stimulus (Figure 2E), is indirect support for claims that  
355 eisosomes either mark sites of endocytosis or positively regulate endocytosis  
356 (Walther, Brickner et al. 2006, Murphy, Boxberger et al. 2011). Importantly, although  
357 the basal competence of  $\Delta$ *seg1* cells is similar to wild type, the role of eisosomes in

358 transformation is unlikely to be restricted to the boosting effect, because a subset of  
359 eisosomes still forms in  $\Delta seg1$  cells (Moreira, Schuck et al. 2012).

360 One of the functions of *YPK1* kinase is to control eisosome formation (Luo, Gruhler  
361 et al. 2008). Deletion of *YPK1* led to the lowest transformation efficiencies out of all  
362 mutant strains we tested in this study. However, further work is needed to clarify the  
363 exact role of Ypk1 in DNA uptake because: Ypk1 also regulates at least one  $\alpha$ -  
364 arrestin (Alvaro, Aindow et al. 2016), it impinges on actin dynamics (Niles and  
365 Powers 2014), and it is involved in the heat stress response (Sun, Miao et al. 2012).  
366 The hypotheses that eisosomes mark sites of endocytosis and that transformation is  
367 facilitated by endocytosis have one point in common: in both cases these types of  
368 endocytosis differ from well-studied endocytic pathways, such as clathrin-mediated  
369 endocytosis that originates at actin patches (Kawai, Pham et al. 2004, Ziólkowska,  
370 Christiano et al. 2012).

371 Alternative endocytic pathways in yeast are not as well-studied as in mammalian  
372 cells. New insights emerged in recent years, for example the  $\alpha$ -arrestins Art1 and  
373 Bul1 can lead to endocytic downregulation of transmembrane transporters in a  
374 clathrin- and ubiquitin-independent manner, relying on Rho1 (Prosser, Drivas et al.  
375 2011, Prosser, Pannunzio et al. 2015). Indeed, as stated above, we found that the  
376 Rsp5-binding domain in Art1 was required to observe high transformation efficiency.  
377 This implies that ubiquitination of cargo proteins does at least partially contribute to  
378 subsequent DNA uptake. Whether endocytic DNA uptake relies on clathrin-coated  
379 vesicles and ubiquitination as a cargo signal *per se*, remains to be seen.  
380 Nevertheless, we propose that an eisosome-mediated pathway is the main route for  
381 efficient DNA delivery into the yeast cell.

## 382 Outlook

383 A complete mechanistic description of the genetic requirements and endocytotic  
384 mechanism for nucleic acid uptake is immensely important not just for understanding  
385 yeast transformation but also for further progress in various fields like gene therapy  
386 in humans, understanding RNA trafficking and improving RNA interference  
387 technologies.

388 It will be exciting to see whether the concept of achieving high transformation  
389 efficiencies in yeast by stimulation of TORC1 can be applied to the mammalian  
390 mTORC system as well. By highlighting the importance of the metabolic state of the  
391 cell, this study opens up new practical possibilities for the improvement of  
392 transformation efficiencies, by fine-tuning the nutrient composition in the  
393 transformation reagent.

## 394 **MATERIALS AND METHODS**

### 395 *S. cerevisiae* strains, plasmids, reagents and equipment

396 This study includes an evaluation of transformation efficiencies of four *S. cerevisiae*  
397 strains, under different nutrient conditions. Namely, the yeast strains MaV203 (from  
398 ProQuest™ Two-Hybrid system (PQ10001-01, Thermo Fisher Scientific), W303-1A,  
399 BY-4743, and THY.AP4 (kindly provided by Bjorn Sabelleck, RWTH Aachen  
400 University). The MaV203 strain was used to generate seven mutant strains. These  
401 included  $\Delta art1$ ,  $\Delta art3$ ,  $\Delta bul1$ ,  $\Delta npr1$ ,  $\Delta seg1$ ,  $\Delta tco89$ , and  $\Delta ypk1$ . Four plasmids,  
402 namely, pDEST22 (PQ1000101, Thermo Fisher Scientific), pDEST32-TaRNR8-p12L  
403 (generated by Dr Sheng-Chun Yu), pRS426-Ldb19, and pRS426-Ldb19<sup>PPxY-less</sup> the  
404 last two plasmids kindly provided by Allyson F. O'Donnell, Duquesne University, PA  
405 USA were used in this study. An AccuTherm™ Microtube Shaking Incubator (I-4002-  
406 HCS, Labnet International, Inc.) was used for the heat-shock process in yeast  
407 transformation. We used the following reagents in this study: Yeast extract (Y1625-  
408 250G, Sigma-Aldrich), Peptone (P5905-1KG, Sigma-Aldrich), Adenine hemisulfate  
409 salt (A3159-100G, Sigma-Aldrich), D-(+)-Glucose (G7021-1KG, Sigma-Aldrich),  
410 yeast nitrogen base without amino acids (Y0626-250G, Sigma-Aldrich), yeast  
411 synthetic drop-out medium supplements (Y2001-20G, Sigma Aldrich), L-histidine  
412 monohydrochloride monohydrate (53370-100G, Sigma-Aldrich), L-tryptophan  
413 (T8941-25G, Sigma-Aldrich), uracil (U1128-25G, Sigma-Aldrich), D-sorbitol (S3889-  
414 1KG, Sigma-Aldrich), Poly(ethylene glycol) BioUltra, 1000 (PEG1000) (81188- 250G,  
415 Sigma-Aldrich), LiAc (6108-17-4, Alfa Aesar), Deoxyribonucleic acid sodium salt  
416 from salmon testes (ss-DNA) (D1626-5G, Sigma-Aldrich), Bicine (B3876-100G,  
417 Sigma-Aldrich), ethylene glycol(324558-100ML, Sigma-Aldrich), dimethyl sulfoxide  
418 (DMSO) (D2650-5 × 5ML, Sigma-Aldrich), Water Molecular Biology Reagent



419 (W4502, Sigma-Aldrich), Ultra-Pure™ Agarose (16500500, Thermo Fisher  
420 Scientific), SYBR® Safe DNA Gel Stain (S33102, ThermoFischer Scientific),  
421 GeneRuler 1kb Plus DNA ladder (SM0311, ThermoFischer Scientific), Zymolyase  
422 from Easy Yeast Plasmid Isolation Kit (630467, Clontech), GoTaq® G2 DNA  
423 Polymerase and 5X Colorless GoTaq® Reaction Buffer (M7841, Promega) and  
424 dNTP mix (R0191, ThermoFischer Scientific).

## 425 *S. cerevisiae* transformation

426 *S. cerevisiae* transformations were performed using the SuccessAA protocol (Yu,  
427 Dawson et al. 2016), an adaptation of the LiAc/SS carrier DNA/PEG method (Gietz  
428 2015) with the addition of amino acids in the transformation mix. The concentration  
429 of amino acids used was 1.25X the concentration of amino acids found in Synthetic  
430 Complete (SC) medium. Briefly, 0.25 µg endotoxin-free pDEST32-TaRNR8-p12L  
431 plasmid (13.8kb) was added into 50 µl MaV203 competent cells, followed by adding  
432 500 µl transformation mix solution, containing 36% (w/v), PEG 1000, 0.1 M LiAc, 0.2  
433 mg/ml ss-DNA, 0.2 M Bicine-NaOH (pH=8.35), and 1.25x amino acid mix solution.  
434 The plasmid DNA was mixed to the competent cells in the transformation mix  
435 solution, and the yeast cells were then heat-shocked in the microtube shaking  
436 Incubator at 37°C for 30 minutes. The transformation mixtures were shaken at the  
437 start and after 15 minutes at 1500 rpm for 5 seconds; at the end of the incubation,  
438 the samples were shaken for 30 seconds. After the heat shock, 50 µl transformation  
439 mixtures containing wild type MaV203 yeast cells or different mutated MaV203 yeast  
440 strains were plated on suitable synthetic “drop-out” plates, and cultured for three  
441 days at 30°C. The numbers of colony forming units (CFU) were counted, and  
442 transformation efficiencies (E) were calculated with the following formula:

443

$$444 \quad E = \frac{CFU}{\mu g \text{ DNA} \times 10^8 \text{ cells}}$$

## 445 *S. cerevisiae* mutant strains generation and yeast colony PCR

446 The current study generated seven yeast mutants to investigate the potential  
447 molecular mechanisms underlying yeast transformation. Targeted gene deletion

448 mutagenesis (gene “knock-out”) mediated by homologous recombination reaction  
449 was used to mutate the following genes in MaV203: *art1*, *art3*, *bul1*, *npr1*, *seg1*,  
450 *tco89*, and *ypk1*. Mutagenesis primers were designed so that the gene of interest  
451 would be replaced by *TRP1*, which served as an auxotrophic selection marker  
452 carried by the pDEST22 plasmid. Primer sequences are shown in Supplementary  
453 Table 1. All the sequences of the forward primers were 74 bases whereas the first 50  
454 bases were identical to the first 50 bases of the target gene, followed by the reverse  
455 and complementary 24-base sequence (6431bp to 6454bp on pDEST22) adjacent to  
456 the ARS/CEN locus in the pDEST22 plasmid. Similarly, the sequences of the reverse  
457 primers were 74 bases whereas the first 50 bases were identical to the last 50 bases  
458 of the target gene, followed by the reverse and complementary 24-base sequence  
459 (5143bp to 5166bp) which is adjacent to the f1 origin in the pDEST22 plasmid. The  
460 plasmid pDEST22, carrying *TRP1*, was used as a PCR template. The PCR thermal  
461 cycled we used was: initial denaturation at 95°C for 3 minutes, followed by 40 cycles  
462 of denaturation at 95°C for 30 seconds, annealing at 45°C for 30 seconds, and  
463 extension at 72°C for 2 minutes and then the final extension at 72°C for 7 minutes.  
464 The PCR products were examined by gel electrophoresis. Once the PCR products  
465 exactly matched the predicted size, the PCR product was purified using QIAquick  
466 PCR Purification Kit. The gene specific PCR products were used to transform *S.*  
467 *cerevisiae* MaV203 as as described above. A 100 µl aliquot of the transformation  
468 mixture was plated on synthetic complete “drop out” tryptophan plates, followed by  
469 culturing the plates at 30°C for three days. Potentially mutated MaV203 yeast  
470 colonies were analysed using a modified version of yeast colony PCR protocol  
471 published in *Molecular Cloning: A Laboratory Manual* (Green 2012). In brief, at least  
472 ten colonies on each plate were randomly selected and approximately 1/10<sup>th</sup> of each  
473 colony was carefully transferred to each sterile PCR tube, containing 5 µl zymolyase  
474 solution (from Easy Yeast Plasmid Isolation Kit). The PCR tubes with yeast-  
475 zymolyase mix were then incubated for 30 minutes at 37°C, followed by incubating  
476 for 10 minutes at 95°C to inactivate zymolyase. After zymolyase inactivation, the  
477 yeast-zymolyase mix was diluted by addition of 95 µl molecular biology grade  
478 endotoxin-free water and then yeast colony PCR was performed. The yeast colony  
479 PCR program was as follows: initial denaturation at 95°C for 5 minutes, followed by  
480 40 cycles of denaturation at 95°C for 1 minute, annealing at 53°C for 1 minute, and  
481 extension at 72°C for 2 minutes and then the final extension at 72°C for 7 minutes.

482 When the colony PCR finished, 5  $\mu$ l PCR reactions were analysed on a 1.5% (w/v)  
483 agarose/TBE gel for 45 minutes at 10V/cm. Successful transformants were identified  
484 based on the predicted PCR product length, for that primers of the adjacent down-  
485 and upstream region of the target gene where designed. Reverse primers binding to  
486 *TRP1* were used in a separate PCR reaction for an additional verification.

## 487 Evaluation of transformation efficiencies

488 Once the mutants were confirmed by yeast colony PCR, the mutants were cultured  
489 on 1x YPAD “drop-out Tryptophan” plates for three days, followed by growth in the  
490 same 1xYPAD “drop-out” medium overnight. Frozen yeast mutant competent cells  
491 were then prepared, transformed, and cultured on 1xYPAD “drop-out leucine and  
492 tryptophan” plates using the SuccessAA protocol (Yu, Dawson et al. 2016). Mutant  
493 transformation efficiencies were measured and compared to the efficiency of wild  
494 type MaV203 yeast cells.

## 495 Statistical Analysis

496 The collected data was not always normally distributed so non-parametric tests were  
497 used, where appropriate. In the evaluation of the transformation efficiency of different  
498 budding yeast strains, there was no inter-group comparison, only two groups were  
499 compared at a time (same yeast strain, with the addition of amino acids or without).  
500 Thus, the Mann-Whitney test were used to assess statistical significance. For  
501 assessment of APIU's effect on transformation efficiency, there were three groups to  
502 be compared so a Kruskal Wallis test, followed by Dunn's post-hoc test was used. In  
503 the rest of the experiments, there was an interaction between the two factors tested,  
504 the addition of amino acids and different mutant yeast strains. For this reason, two-  
505 way ANOVA was used to assess statistical significance, followed by Tukey's multiple  
506 comparisons test. Statistical analysis was performed in GraphPad Prism 7.03.

507

## 508 Competing interests

509 The authors declare no competing financial interests.

## 510 Contributions

511 S.-C.Y. conceived the original idea of this study. S.-C.Y., F.K. and N.S.P. designed  
512 and carried out the experiments, analysed the data and drafted the paper. P.D.S.  
513 supervised and advised the work and edited the manuscript.

## 514 Acknowledgements

515 We thank Mark Isalan (Imperial College London) for invaluable advice on yeast  
516 mutagenesis Allyson O'Donnell (Duquesne University, PA USA) who kindly provided  
517 and the pRS426-Ldb19, and pRS426-Ldb19<sup>PPxY-less</sup> plasmids.

## 518 References

- 519 Alvaro, C. G., A. Aindow and J. Thorner (2016). "Differential phosphorylation provides a  
520 switch to control how alpha-arrestin Rod1 down-regulates mating pheromone response in  
521 *Saccharomyces cerevisiae*." *Genetics* **203**(1): 299-317.
- 522 Athanasopoulos, A., H. Boleti, C. Scazzocchio and V. Sophianopoulou (2013). "Eisosome  
523 distribution and localization in the meiotic progeny of *Aspergillus nidulans*." *Fungal Genet*  
524 *Biol* **53**: 84-96.
- 525 Beggs, J. D. (1978). "Transformation of yeast by a replicating hybrid plasmid." *Nature*  
526 **275**(5676): 104-109.
- 527 Brach, T., T. Specht and M. Kaksonen (2011). "Reassessment of the role of plasma  
528 membrane domains in the regulation of vesicular traffic in yeast." *J Cell Sci* **124**(Pt 3): 328-  
529 337.
- 530 Conrad, M., J. Schothorst, H. N. Kankipati, G. Van Zeebroeck, M. Rubio-Teixeira and J. M.  
531 Thevelein (2014). "Nutrient sensing and signaling in the yeast *Saccharomyces cerevisiae*." *FEMS Microbiol Rev* **38**(2): 254-299.
- 532 Dokudovskaya, S. and M. P. Rout (2015). "SEA you later all-GATOR--a dynamic regulator of  
533 the TORC1 stress response pathway." *J Cell Sci* **128**(12): 2219-2228.
- 534 Douglas, L. M. and J. B. Konopka (2014). "Fungal membrane organization: the eisosome  
535 concept." *Annu Rev Microbiol* **68**: 377-393.
- 536 Fields, S. and O. Song (1989). "A novel genetic system to detect protein-protein  
537 interactions." *Nature* **340**: 245.
- 538 Fröhlich, F., K. Moreira, P. S. Aguilar, N. C. Hubner, M. Mann, P. Walter and T. C. Walther  
539 (2009). "A genome-wide screen for genes affecting eisosomes reveals Nce102 function in  
540 sphingolipid signaling." *The Journal of Cell Biology* **185**(7): 1227.
- 541 Ghaddar, K., A. Merhi, E. Saliba, E. M. Krammer, M. Prévost and B. André (2014). "Substrate-  
542 induced ubiquitylation and endocytosis of yeast amino acid permeases." *Molecular and*  
543 *Cellular Biology* **34**(24): 4447-4463.

- 545 Gietz, R. D. (2015). High Efficiency DNA Transformation of *Saccharomyces cerevisiae* with  
546 the LiAc/SS-DNA/PEG Method. Genetic Transformation Systems in Fungi, Volume 1. A. M.  
547 van den Berg and K. Maruthachalam. Cham, Springer International Publishing: 177-186.
- 548 González, A. and M. N. Hall (2017). "Nutrient sensing and TOR signaling in yeast and  
549 mammals." The EMBO Journal.
- 550 Green, M. R. S., J. (2012). Protocol 6: Yeast Colony PCR.
- 551 Grossmann, G., J. Malinsky, W. Stahlschmidt, M. Loibl, I. Weig-Meckl, W. B. Frommer, M.  
552 Opekarova and W. Tanner (2008). "Plasma membrane microdomains regulate turnover of  
553 transport proteins in yeast." J Cell Biol **183**(6): 1075-1088.
- 554 Grossmann, G., M. Opekarová, J. Malinsky, I. Weig-Meckl and W. Tanner (2007).  
555 "Membrane potential governs lateral segregation of plasma membrane proteins and lipids  
556 in yeast." The EMBO Journal **26**(1): 1-8.
- 557 Helliwell, S. B., S. Losko and C. A. Kaiser (2001). "Components of a ubiquitin ligase complex  
558 specify polyubiquitination and intracellular trafficking of the general amino acid permease."  
559 The Journal of Cell Biology **153**(4): 649-662.
- 560 Hinnen, A., J. B. Hicks and G. R. Fink (1978). "Transformation of yeast." Proceedings of the  
561 National Academy of Sciences of the United States of America **75**(4): 1929-1933.
- 562 Iesmantavicius, V., B. T. Weinert and C. Choudhary (2014). "Convergence of ubiquitylation  
563 and phosphorylation signaling in rapamycin-treated yeast cells." Mol Cell Proteomics **13**(8):  
564 1979-1992.
- 565 Kawai, S., W. Hashimoto and K. Murata (2010). "Transformation of *Saccharomyces*  
566 *cerevisiae* and other fungi." Bioengineered Bugs **1**(6): 395-403.
- 567 Kawai, S., T. A. Pham, H. T. Nguyen, H. Nankai, T. Utsumi, Y. Fukuda and K. Murata (2004).  
568 "Molecular insights on DNA delivery into *Saccharomyces cerevisiae*." Biochem Biophys Res  
569 Commun **317**(1): 100-107.
- 570 Lauwers, E., G. Grossmann and B. Andre (2007). "Evidence for coupled biogenesis of yeast  
571 Gap1 permease and sphingolipids: essential role in transport activity and normal control by  
572 ubiquitination." Mol Biol Cell **18**(8): 3068-3080.
- 573 Lin, C. H., J. A. MacGurn, T. Chu, C. J. Stefan and S. D. Emr (2008). "Arrestin-related  
574 ubiquitin-ligase adaptors regulate endocytosis and protein turnover at the cell surface." Cell  
575 **135**(4): 714-725.
- 576 Lin, C. H., J. A. MacGurn, T. Chu, C. J. Stefan and S. D. Emr (2008). "Arrestin-related  
577 ubiquitin-ligase adaptors regulate endocytosis and protein turnover at the cell surface." Cell  
578 **135**(4): 714-725.
- 579 Luo, G., A. Gruhler, Y. Liu, O. N. Jensen and R. C. Dickson (2008). "The sphingolipid long-  
580 chain base-Pkh1/2-Ypk1/2 signaling pathway regulates eisosome assembly and turnover." J  
581 Biol Chem **283**(16): 10433-10444.
- 582 MacGurn, J. A., P. C. Hsu, M. B. Smolka and S. D. Emr (2011). "TORC1 regulates endocytosis  
583 via Npr1-mediated phosphoinhibition of a ubiquitin ligase adaptor." Cell **147**(5): 1104-1117.
- 584 Merhi, A. and B. Andre (2012). "Internal amino acids promote Gap1 permease ubiquitylation  
585 via TORC1/Npr1/14-3-3-dependent control of the Bul arrestin-like adaptors." Mol Cell Biol  
586 **32**(22): 4510-4522.
- 587 Mitrikeski, P. T. (2013). "Yeast competence for exogenous DNA uptake: towards  
588 understanding its genetic component." Antonie van Leeuwenhoek **103**(6): 1181-1207.
- 589 Moor, H. and K. Muhlethaler (1963). "Fine structure in frozen-etched yeast cells." J Cell Biol  
590 **17**(3): 609-628.

- 591 Moreira, K. E., S. Schuck, B. Schrul, F. Frohlich, J. B. Moseley, T. C. Walther and P. Walter  
592 (2012). "Seg1 controls eisosome assembly and shape." *J Cell Biol* **198**(3): 405-420.
- 593 Murphy, E. R., J. Boxberger, R. Colvin, S. J. Lee, G. Zahn, F. Loor and K. Kim (2011). "Pil1, an  
594 eisosome organizer, plays an important role in the recruitment of synaptojanins and  
595 amphiphysins to facilitate receptor-mediated endocytosis in yeast." *Eur J Cell Biol* **90**(10):  
596 825-833.
- 597 Nikko, E. and H. R. Pelham (2009). "Arrestin-mediated endocytosis of yeast plasma  
598 membrane transporters." *Traffic* **10**(12): 1856-1867.
- 599 Niles, B. J. and T. Powers (2014). "TOR complex 2–Ypk1 signaling regulates actin polarization  
600 via reactive oxygen species." *Molecular Biology of the Cell* **25**(24): 3962-3972.
- 601 O'Donnell, A. F. (2012). "The running of the Buls: control of permease trafficking by  $\alpha$ -  
602 arrestins Bul1 and Bul2." *Molecular and Cellular Biology* **32**(22): 4506-4509.
- 603 O'Donnell, A. F., A. Apffel, R. G. Gardner and M. S. Cyert (2010). "Alpha-arrestins Aly1 and  
604 Aly2 regulate intracellular trafficking in response to nutrient signaling." *Mol Biol Cell* **21**(20):  
605 3552-3566.
- 606 Opekarova, M., T. Caspari, B. Pinson, D. Brethes and W. Tanner (1998). "Post-translational  
607 fate of CAN1 permease of *Saccharomyces cerevisiae*." *Yeast* **14**(3): 215-224.
- 608 Prosser, D. C., T. G. Drivas, L. Maldonado-Baez and B. Wendland (2011). "Existence of a  
609 novel clathrin-independent endocytic pathway in yeast that depends on Rho1 and formin." *J*  
610 *Cell Biol* **195**(4): 657-671.
- 611 Prosser, D. C., A. E. Pannunzio, J. L. Brodsky, J. Thorner, B. Wendland and A. F. O'Donnell  
612 (2015). "alpha-Arrestins participate in cargo selection for both clathrin-independent and  
613 clathrin-mediated endocytosis." *J Cell Sci* **128**(22): 4220-4234.
- 614 Seger, S., R. Rischatsch and P. Philippson (2011). "Formation and stability of eisosomes in  
615 the filamentous fungus *Ashbya gossypii*." *J Cell Sci* **124**(Pt 10): 1629-1634.
- 616 Stradalova, V., W. Stahlschmidt, G. Grossmann, M. Blazikova, R. Rachel, W. Tanner and J.  
617 Malinsky (2009). "Furrow-like invaginations of the yeast plasma membrane correspond to  
618 membrane compartment of Can1." *J Cell Sci* **122**(Pt 16): 2887-2894.
- 619 Sun, Y., Y. Miao, Y. Yamane, C. Zhang, K. M. Shokat, H. Takematsu, Y. Kozutsumi and D. G.  
620 Drubin (2012). "Orm protein phosphoregulation mediates transient sphingolipid  
621 biosynthesis response to heat stress via the Pkh-Ypk and Cdc55-PP2A pathways." *Mol Biol*  
622 *Cell* **23**(12): 2388-2398.
- 623 Toret, C. P. and D. G. Drubin (2006). "The budding yeast endocytic pathway." *Journal of Cell*  
624 *Science* **119**(22): 4585-4587.
- 625 Vangelatos, I., K. Roumelioti, C. Gournas, T. Suarez, C. Scazzocchio and V. Sophianopoulou  
626 (2010). "Eisosome organization in the filamentous ascomycete *Aspergillus nidulans*." *Eukaryotic Cell* **9**(10): 1441-1454.
- 627 Walther, T. C., J. H. Brickner, P. S. Aguilar, S. Bernales, C. Pantoja and P. Walter (2006).  
628 "Eisosomes mark static sites of endocytosis." *Nature* **439**: 998.
- 629 Yashiroda, H., T. Oguchi, Y. Yasuda, E. A. Toh and Y. Kikuchi (1996). "Bul1, a new protein that  
630 binds to the Rsp5 ubiquitin ligase in *Saccharomyces cerevisiae*." *Mol Cell Biol* **16**(7): 3255-  
631 3263.
- 632  
633 Yu, S.-C., A. Dawson, A. C. Henderson, E. J. Lockyer, E. Read, G. Sritharan, M. Ryan, M. Sgroi,  
634 P. M. Ngou, R. Woodruff, R. Zhang, T. Ren Teen Chia, Y. Liu, Y. Xiang and P. D. Spanu (2016).  
635 "Nutrient supplements boost yeast transformation efficiency." *Scientific Reports* **6**: 35738.

636 Ziólkowska, N. E., R. Christiano and T. C. Walther (2012). "Organized living: formation  
 637 mechanisms and functions of plasma membrane domains in yeast." Trends in Cell Biology  
 638 **22**(3): 151-158.

639

640 **Supplementary Table 1: Mutagenesis primers sequence**

|              | <b>Forward</b>                                                                     | <b>Reverse</b>                                                                     |
|--------------|------------------------------------------------------------------------------------|------------------------------------------------------------------------------------|
| <b>Tco89</b> | ATGGTTCATCGAGGAAGGACTTTGAAGTCAGACACTGAT<br>GTAACATCTCTTAAGAAACCATTATTATCATGACA     | TCACCTTGTGTGGCTGTGTATGCATGTAGCCCACATTTTCCA<br>TCCTGC CCTGATGCGGTATTTTCTCCTTAC      |
| <b>Art1</b>  | ATGGCATTTCACGTCTTACATCTACTCATCGTCCAATCA<br>TAACGGCTATAAGAAACCATTATTATCATGACA       | CTACTGGGTTATTCTATTGGAATCTAGAAAATCGGAAAAGTTT<br>TGTATTC CCTGATGCGGTATTTTCTCCTTAC    |
| <b>Npr1</b>  | ATGTCTTCATTAECTCGATTGCTACAGGAAAAA<br>CGAAAAAATGAAACTTCTAAGAAACCATTATTA<br>TCATGACA | TTATTGATTATTTTGTCTTTTCTTTTCTTTTCTAGGCTGCAAT<br>ATGTGCTGATGCGGTATTTTCTCCTTAC        |
| <b>Bul1</b>  | ATGGCCAAAGATTGAAACGATTCGGGGTTTCCACCGAAG<br>AGGAAGCCTTTTAAGAAACCATTATTATCATGACA     | TTATTTTGTCACTTGCCTAACAGAAATAGGGATATCAATCTTC<br>GCTACGCCCTGATGCGGTATTTTCTCCTTAC     |
| <b>Art3</b>  | ATGCCCATGGACCAATCTATCTCATCTCCATT<br>GTTTCCCATGGAAAAGGATAAGAAACCATTAT<br>TATCATGACA | CTAAAGGGTACTCTCATTTATACTTTGTAATCCAG<br>ATTCATTATCTAACGCCTGATGCGGTATTTTCTCC<br>TTAC |
| <b>Seg1</b>  | ATGTTTAGAAGAAGAACAACACTGCACCAGAAATGGAACAG<br>GCGGACCCGACTAAGAAACCATTATTATCATGACA   | CTATTTCTTTCTACCAAAGATTTTTTTCAGTTTTTTCGCCGAAACT<br>ACCTCCTGATGCGGTATTTTCTCCTTAC     |
| <b>Ypk1</b>  | ATGTATTCTTGGAAAGTCAAAGTTAAGTTTGGAAAATCTA<br>AAGAAGAAAATAAGAAACCATTATTATCATGACA     | CTATCTAATGCTTCTACCTTGCACCATTGAGCTACCTAGCTGTT<br>CATTTCCCTGATGCGGTATTTTCTCCTTAC     |

641

642 **Supplementary Table 2: Diagnostic primers sequence**

|                                 | <b>Forward</b>           | <b>Reverse</b>             |
|---------------------------------|--------------------------|----------------------------|
| <b>Tco89</b><br>Inside/Outside  | GGACGACCTGACTAGAGA       | ACCATTTGTCTCCACACC         |
| <b>Tco89</b><br>Outside/Outside | TAACCGCAAGGATAGCTAGTTGCG | GAGATACGGAATCCAGCGAAATCG   |
| <b>Art1</b><br>Inside/Outside   | AACCGTTGATGCTGATGAGGAG   | TATGGTGCCTCTCAGTACAATCTGC  |
| <b>Art1</b><br>Outside/Outside  | TTCGGAGGAGAACGCTGTTG     | ACGTGGCAGATTGTTGAAGATATACG |

|                                |                            |                            |
|--------------------------------|----------------------------|----------------------------|
| <b>Npr1</b><br>Inside/Outside  | TATGGGCCGCCTTTAGTTGTATAGAG | AGTTCCAATCCAAAAGTTCACCTGTC |
| <b>Npr1</b><br>Outside/Outside | TATGGGCCGCCTTTAGTTGTATAGAG | GCACTTTCTAAAGCTTCTTTGCTGTG |
| <b>Bul1</b><br>Inside/Outside  | GTTCGTGTGTGTCAACAGGTATATCG | TAGATCGGCAAGTGCACAAACAATAC |
| <b>Art3</b><br>Inside/Outside  | ACTCCCTTGCGCCATCTATC       | GCATCCGCTTACAGACAAGC       |
| <b>Seg1</b><br>Inside/Outside  | TTTCAGTGCTCCCTTACTTTACCG   | GCTTACATCAACACCAATAACGCC   |
| <b>Ypk1</b><br>Inside/Outside  | ATTACGAACATATCGAATGCGAGCAG | TAATAACAGACATACTCCAAGCTGCC |
